# Supplementary material
Source: publisher figshare collection journal article supplement (https://karger.figshare.com/articles/dataset/_/5620816)
Supplement: Supplementary file 2 [file 1]

## **SUPPLEMENTARY TABLE S2**

### **A case report of syndromic multinodular goitre in adolescence:**

#### **Exploring the phenotypic overlap between Cowden and DICER1 syndromes**

**Dorothee Bouron-Dal Soglio**, MD, PhD<sup>1</sup>, **Leanne de Kock**, B-Tech<sup>2,3</sup>, **Richard Gauci**, MBBS, FRACP<sup>7</sup>, **Nelly Sabbaghian**, MSc<sup>2</sup>, **Elizabeth Thomas**, MBBS (Hons), FRACP<sup>7,8</sup>, **Helen C. Atkinson**, BSc(Hons) PhD<sup>9</sup>, **Nicholas Pachter**, MBChB, FRACP<sup>9,10</sup>, **Simon Ryan**, MBBS, FRACS<sup>13</sup>, **John P. Walsh**, MBBS, FRACP, PhD<sup>5,9</sup>, **M. Priyanthi Kumarasinghe**, MBBS, MD, FRCPA, DipCytopathol(RCPA)<sup>4</sup>, **Karen Carpenter**, BSc, PhD, FHGSA<sup>10</sup>, **Ayça Aydoğan**<sup>6</sup>, **Colin J.R. Stewart**, MBChB, FRCPath, FRCPA<sup>9</sup>, **William D. Foulkes**, MBBS, PhD<sup>2,3,12</sup>, **Catherine S. Choong**, MBBS, MD, FRACP<sup>8,9</sup>

**Supplementary Table S2: DICER1 syndrome-related diseases**

| <b>Tumour</b>                                                     | <b>Abbreviation</b> | <b>Typical age of onset</b> |
|-------------------------------------------------------------------|---------------------|-----------------------------|
| Pleuropulmonary blastoma                                          | PPB                 | ~ 0-6 years                 |
| Cystic nephroma                                                   | CN                  | 0-4 years                   |
| Ovarian sex cord-stromal tumour (esp. Sertoli-Leydig cell tumour) | SCST (SLCT)         | ~ 2-45 years                |
| Multinodular goitre                                               | MNG                 | ~ 5-40 years                |
| Ciliary body medulloepithelioma                                   | CBME                | ~ 8-15 years                |
| Nasal chondromesenchymal hamartoma                                | NCMH                | ~ 6-21 years                |
| Cervical embryonal rhabdomyosarcoma                               | cERMS               | ~ 10-20 years               |
| Pituitary blastoma                                                | PitB                | < 24 months                 |
| Pineoblastoma                                                     | PinB                | ~ 2-24 years                |
| DICER1 anaplastic sarcoma of the kidney                           | D1 ASK              | ~ 1-20 years                |
| Differentiated thyroid carcinoma                                  | DTC                 | ~ 5-40 years                |
| Ovarian embryonal rhabdomyosarcoma                                | oERMS               | ?                           |
| Well-differentiated fetal lung adenocarcinoma                     | WDFA                | ?                           |

**References:** Foulkes WD, Priest JR, Duchaine TF 2014 DICER1: mutations, microRNAs and mechanisms. *Nat Rev Cancer* **14**:662-672; de Kock et al. 2016 Germline and somatic *DICER1* mutations in a well-differentiated fetal adenocarcinoma of the lung. *J Thorac Oncol* **11**: e31-3.
