# Supplementary material
Source: publisher figshare collection journal article supplement (https://karger.figshare.com/articles/dataset/_/5620816)
Supplement: Supplementary file 3 [file 1]

## **SUPPLEMENTARY TABLE S1**

### **A case report of syndromic multinodular goitre in adolescence:**

#### **Exploring the phenotypic overlap between Cowden and DICER1 syndromes**

**Dorothee Bouron-Dal Soglio**, MD, PhD<sup>1</sup>, **Leanne de Kock**, B-Tech<sup>2,3</sup>, **Richard Gauci**, MBBS, FRACP<sup>7</sup>, **Nelly Sabbaghian**, MSc<sup>2</sup>, **Elizabeth Thomas**, MBBS (Hons), FRACP<sup>7,8</sup>, **Helen C. Atkinson**, BSc(Hons) PhD<sup>9</sup>, **Nicholas Pachter**, MBChB, FRACP<sup>9,10</sup>, **Simon Ryan**, MBBS, FRACS<sup>13</sup>, **John P. Walsh**, MBBS, FRACP, PhD<sup>5,9</sup>, **M. Priyanthi Kumarasinghe**, MBBS, MD, FRCPA, DipCytopathol(RCPA)<sup>4</sup>, **Karen Carpenter**, BSc, PhD, FHGSA<sup>10</sup>, **Ayça Aydoğan**<sup>6</sup>, **Colin J.R. Stewart**, MBChB, FRCPath, FRCPA<sup>9</sup>, **William D. Foulkes**, MBBS, PhD<sup>2,3,12</sup>, **Catherine S. Choong**, MBBS, MD, FRACP<sup>8,9</sup>

**Supplementary Table S1:** Cowden syndrome diagnostic criteria

| Major Criteria                                                                            |
|-------------------------------------------------------------------------------------------|
| Adult-onset Lhermitte-Duclos disease                                                      |
| Mucocutaneous lesion (e.g. facial trichilemmomas, acral keratoses, papillomatous lesions) |
| Breast carcinoma                                                                          |
| Thyroid carcinoma (papillary or follicular)                                               |
| Macrocephaly > 97 <sup>th</sup> percentile                                                |
| Endometrial carcinoma                                                                     |
| Minor Criteria                                                                            |
| Other thyroid lesions (multinodular goitre, adenoma)                                      |
| Mental retardation                                                                        |
| Gastrointestinal hamartoma                                                                |
| Fibrocystic lesions of the breast                                                         |
| Lipomas                                                                                   |
| Fibromas                                                                                  |
| Genitourinary tumours or malformations                                                    |

**Reference:**

Hobert JA, Eng C 2009 PTEN hamartoma tumor syndrome: an overview. Genetics in medicine 11:687-694.
