# Supplementary material
Source: publisher figshare collection journal article supplement (https://karger.figshare.com/articles/dataset/_/5620816)
Supplement: Supplementary file 5 [file 1]

## **SUPPLEMENTARY FIGURE S1**

### **A case report of syndromic multinodular goitre in adolescence:**

#### **Exploring the phenotypic overlap between Cowden and DICER1 syndromes**

**Dorothee Bouron-Dal Soglio**, MD, PhD<sup>1</sup>, **Leanne de Kock**, B-Tech<sup>2,3</sup>, **Richard Gauci**, MBBS, FRACP<sup>7</sup>, **Nelly Sabbaghian**, MSc<sup>2</sup>, **Elizabeth Thomas**, MBBS (Hons), FRACP<sup>7,8</sup>, **Helen C. Atkinson**, BSc(Hons) PhD<sup>9</sup>, **Nicholas Pachter**, MBChB, FRACP<sup>9,10</sup>, **Simon Ryan**, MBBS, FRACS<sup>13</sup>, **John P. Walsh**, MBBS, FRACP, PhD<sup>5,9</sup>, **M. Priyanthi Kumarasinghe**, MBBS, MD, FRCPA, DipCytopathol(RCPA)<sup>4</sup>, **Karen Carpenter**, BSc, PhD, FHGSA<sup>10</sup>, **Ayça Aydoğan**<sup>6</sup>, **Colin J.R. Stewart**, MBChB, FRCPath, FRCPA<sup>9</sup>, **William D. Foulkes**, MBBS, PhD<sup>2,3,12</sup>, **Catherine S. Choong**, MBBS, MD, FRACP<sup>8,9</sup>

**Supplementary Figure S1**

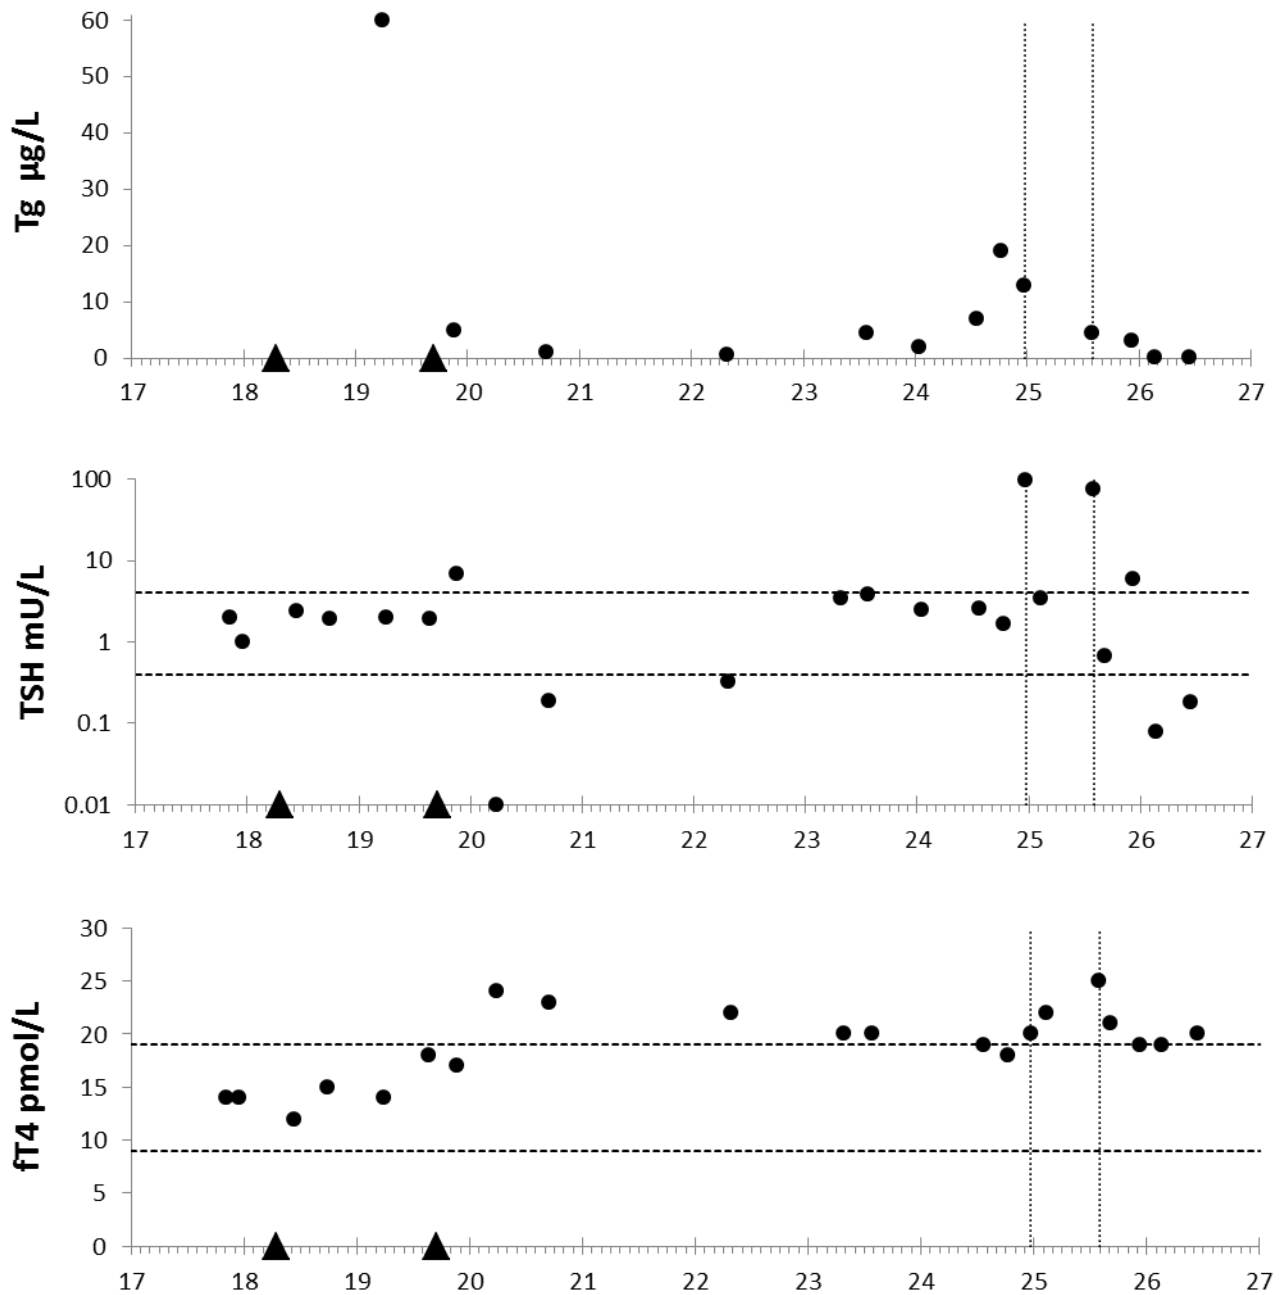

**Serum biochemistry for Tg and TSH and free T4 (fT4).** Horizontal dashed lines indicate expected ranges for TSH and fT4. Triangles on x-axes indicate patients' age at time of thyroid surgeries (hemithyroidectomy followed by completion thyroidectomy). Vertical dotted lines indicate the patients' age at the time of the rhTSH stimulation and 131-Iodine administration.
